# Supplementary material for: Identification of Clubroot (Plasmodiophora brassicae) Resistance Loci in Chinese Cabbage (Brassica rapa ssp. pekinensis) with Recessive Character
Source: MDPI journal article supplement (doi:10.3390/genes15030274), 2024-02-22
Supplement: s1 [file s1]

**Table S1.** Disease evaluations of clubroot resistance in Chinese cabbage materials

| Number | Name     | Type            | Disease Index |
|--------|----------|-----------------|---------------|
| 1      | Taqing   | Chinese cabbage | 90.58         |
| 2      | Quanmei  | Chinese cabbage | 77.78         |
| 3      | Heatwave | Chinese cabbage | 100.00        |
| 4      | Bak10    | Chinese cabbage | 90.58         |
| 5      | Bak11    | Chinese cabbage | 97.62         |
| 6      | Bak12    | Chinese cabbage | 100.00        |
| 7      | Bac1343  | pac choi        | 96.97         |
| 8      | Bac1344  | pac choi        | 100.00        |
| 9      | Bae090   | pac choi        | 100.00        |
| 10     | Bae091   | pac choi        | 92.03         |
| 11     | Bae092   | pac choi        | 95.56         |
