# Supplementary material for: Identification of Clubroot (Plasmodiophora brassicae) Resistance Loci in Chinese Cabbage (Brassica rapa ssp. pekinensis) with Recessive Character
Source: MDPI journal article supplement (doi:10.3390/genes15030274), 2024-02-22
Supplement: s1 [file s1]

**Table S5.** Candidate genes information of *Cr4Ba1.1*

| Gene ID          | Homologous gene  | Annotation                                                                                                                                     | <i>A. thaliana</i><br>Highest expression |
|------------------|------------------|------------------------------------------------------------------------------------------------------------------------------------------------|------------------------------------------|
| <i>Bra013275</i> | <i>AT4G18010</i> | Encodes an inositol polyphosphate 5-phosphatase, overexpression of this gene renders plants insensitive to ABA in germination and growth assay | Root                                     |
| <i>Bra013281</i> | <i>AT1G11130</i> | Signal transduction mechanisms; Protein kinase/tyrosine domain                                                                                 | root                                     |
| <i>Bra013289</i> | <i>AT4G18170</i> | WRKY DNA-binding domain                                                                                                                        | Root, flower                             |
| <i>Bra013299</i> | <i>AT4G18360</i> | Energy production and conversion; FMN-dependent dehydrogenase; Nitronate monooxygenase;                                                        | Root                                     |
| <i>Bra013310</i> | <i>AT4G18450</i> | IMP dehydrogenase / GMP reductase domain; Thiazole biosynthesis protein ThiG                                                                   | —                                        |
| <i>Bra013336</i> | <i>AT4G18640</i> | AP2 domain; Ethylene-responsive transcription factor                                                                                           | —                                        |
| <i>Bra013336</i> | <i>AT4G18640</i> | Protein tyrosine/kinase kinase; Leucine rich repeat N-terminal domain; Leucine Rich repeats (2 copies)                                         | Stem                                     |
| <i>Bra013339</i> | <i>AT4G18670</i> | Leucine rich repeat; Leucine Rich repeats (2 copies);                                                                                          | Flower                                   |
| <i>Bra013341</i> | <i>AT4G18710</i> | Leucine rich repeat N-terminal domain; Carbohydrate transport and metabolism                                                                   | Root, stem                               |
| <i>Bra013345</i> | <i>AT4G18760</i> | Leucine Rich repeats (2 copies); Leucine rich repeat                                                                                           | Flower                                   |
| <i>Bra013347</i> | —                | F-box associated                                                                                                                               | —                                        |
| <i>Bra013348</i> | —                | F-box domain                                                                                                                                   | —                                        |
| <i>Bra013357</i> | <i>AT4G19920</i> | TIR domain                                                                                                                                     | Root                                     |
