# Supplementary material for: Identification of Clubroot (Plasmodiophora brassicae) Resistance Loci in Chinese Cabbage (Brassica rapa ssp. pekinensis) with Recessive Character
Source: MDPI journal article supplement (doi:10.3390/genes15030274), 2024-02-22
Supplement: s1 [file s1]

**Table S6.** The special primers sequences of candidate genes in A01 used in qRT-PCR

| Gene             | Primer | Primer sequence                                          |
|------------------|--------|----------------------------------------------------------|
| <i>Bra013281</i> | 3281-1 | F: GAATTGCTCACTGGACGC<br>R: TCTCGTCAACGCATCTATG          |
| <i>Bra013289</i> | 3289-1 | F: CGGAGATTAGTCGGAAGC<br>R: GCAAAGGTGCAATGTGAAG          |
| <i>Bra013336</i> | 3336-2 | F: TCTTTACAGCTCTTTTACGGC<br>R: TTGCTTCTTTCCTCGGT         |
| <i>Bra013339</i> | 3339-1 | F: TGGGCGATCAGTTACTCCT<br>R:<br>ATCATCGGAGGACTAGCTGG     |
| <i>Bra013341</i> | 3341-1 | F:<br>GTTCGATAGATCCATATTCGTC<br>R: ACTACCTCCAGAACCGGA    |
| <i>Bra013357</i> | 3357-3 | F: CACCGTGAAACATCTCCG<br>R: GCCTCCTTCCATCTATTGG          |
| Actin            | Actin  | F:<br>GGAGCTGAGAGATTCCGTTG<br>R:<br>GGAGCTGAGAGATTCCGTTG |
