# Supplementary material for: Identification of Clubroot (Plasmodiophora brassicae) Resistance Loci in Chinese Cabbage (Brassica rapa ssp. pekinensis) with Recessive Character
Source: MDPI journal article supplement (doi:10.3390/genes15030274), 2024-02-22
Supplement: s1 [file s1]

**Table S4.** Candidate genes information of *Cr4Ba8.1*

| Gene             | Homologous gene  | Functional annotation                                                                       | Highest expression |
|------------------|------------------|---------------------------------------------------------------------------------------------|--------------------|
| <i>Bra020858</i> | <i>AT4G22100</i> | Carbohydrate transport and metabolism                                                       | —                  |
| <i>Bra020859</i> | <i>AT4G22080</i> | Pectate lyase; Right handed beta helix region                                               | Root               |
| <i>Bra020860</i> | <i>AT4G22060</i> | F-box domain                                                                                | Silique            |
| <i>Bra020861</i> | <i>AT3G25510</i> | TIR domain; Leucine Rich repeats (2/6 copies); NB-ARC domain                                | Root               |
| <i>Bra020862</i> | <i>AT4G21910</i> | MatE                                                                                        | Flower             |
| <i>Bra020863</i> | <i>AT4G21910</i> | MatE                                                                                        | Flower             |
| <i>Bra020864</i> | <i>AT4G21895</i> | AT hook motif; DNA binding protein                                                          | Flower             |
| <i>Bra020865</i> | <i>AT4G21870</i> | Hsp20/alpha crystallin family; Posttranslational modification, protein turnover, chaperones | Flower             |
| <i>Bra020866</i> | <i>AT4G21865</i> | Unknown                                                                                     | Flower             |
| <i>Bra020867</i> | —                | Unknown                                                                                     | —                  |
| <i>Bra020868</i> | <i>AT4G21850</i> | SelR domain; Peptide methionine sulfoxide reductase B9                                      | Root               |
| <i>Bra020870</i> | <i>AT4G21810</i> | Der1-like family                                                                            | Leaf               |
| <i>Bra020871</i> | <i>AT4G21800</i> | Conserved hypothetical ATP binding protein; 50S ribosome-binding GTPase; Ras family         | Leaf               |
| <i>Bra020872</i> | <i>AT4G21750</i> | START domain; Homeobox domain                                                               | Flower             |
| <i>Bra020873</i> | <i>AT4G21710</i> | RNA polymerase Rpb2, domain 2/3/4/5/6/7; RNA polymerase beta subunit; B3 DNA binding domain | Root               |
| <i>Bra020874</i> | —                | B3 DNA binding domain                                                                       | —                  |
| <i>Bra020875</i> | <i>AT4G20930</i> | NAD binding domain of 6-phosphogluconate dehydrogenase                                      | Flower             |
| <i>Bra020876</i> | <i>AT4G20940</i> | Leucine Rich repeats (2 copies)                                                             | Flower             |
