# Supplementary material for: Identification of Clubroot (Plasmodiophora brassicae) Resistance Loci in Chinese Cabbage (Brassica rapa ssp. pekinensis) with Recessive Character
Source: MDPI journal article supplement (doi:10.3390/genes15030274), 2024-02-22
Supplement: s1 [file s1]

**Table S3.** SNP/InDel makers primers information for localized genes

| Primer       | Primer sequence                                                                                                                                                                                  |
|--------------|--------------------------------------------------------------------------------------------------------------------------------------------------------------------------------------------------|
| A08_10315153 | Fa: GAAGGTGACCAAGTTCATGCTGAGCTAAATCCGAAAGAGAGAATCG<br>Fb:<br>GAAGGTCGGAGTCAACGGATTAGAGCTAAATCCGAAAGAGAGAATCT<br>R: AAGAACGGTACTGTTTTGATCCGAAAC                                                   |
| A08_10219867 | Fa: GAAGGTGACCAAGTTCATGCTGGAGCATTGTCTTATAACTGCATAC<br>Fb:<br>GAAGGTCGGAGTCAACGGATTAGGAGCATTGTCTTATAACTGCATAT<br>R: TACATAACCCTCCAAATAACATTTTCCATTG                                               |
| A08_10452505 | Fa: GAAGGTGACCAAGTTCATGCTTACTGCTCCACCGTATGAAAACAAA<br>Fb: GAAGGTCGGAGTCAACGGATTCTGCTCCACCGTATGAAAACAAG<br>R: CAGATAAGTCAAACTCCCATCTGAATTG                                                        |
| A08_10700494 | Fa: GAAGGTGACCAAGTTCATGCTTGATGTCTCCCCTCAAATCCAAC<br>Fb: GAAGGTCGGAGTCAACGGATTGATGTCTCCCCTCAAATCCAAG<br>R: TTACTGTTATCGCCGTGGACTTTGC<br>Fa:<br>GAAGGTGACCAAGTTCATGCTCAATTAAGGTATACACGTTATTTATATTC |
| A08_10796612 | AAC<br>Fb:<br>GAAGGTCGGAGTCAACGGATTATCAATTAAGGTATACACGTTATTTATAT<br>TCAAT<br>R: TACGGGAAGTAAAATATTGAATTTTGACCCA<br>Fa:<br>GAAGGTGACCAAGTTCATGCTATCACTATAACTAATTAATATTTGAACTA                     |
| A08_10845215 | AATTATAT<br>Fb:<br>GAAGGTCGGAGTCAACGGATTTCACTATAACTAATTAATATTTGAACTA<br>AATTATAC<br>R: CATTCGGATCCACATCAGAAATGTTTAC<br>Fa:<br>GAAGGTGACCAAGTTCATGCTAATAAAACTACGTTAGAAAAATTGCAAC                  |
| A08_10968946 | TTG<br>Fb:<br>GAAGGTCGGAGTCAACGGATTATTAATAAAACTACGTTAGAAAAATTGCA<br>AACTTA<br>R: AACCACGTATAGTTTGCATGCATATTCC<br>Fa:                                                                             |

1150830 GAAGGTGACCAAGTTCATGCTGTCATCATTATATTGTAGTTAAGTCATTC  
0 TTT  
Fb:  
GAAGGTCGGAGTCAACGGATTGTCATCATTATATTGTAGTTAAGTCATTC  
TTA  
R: TGAACCTATGACCTCTTAGATCAAATTTAAC  
Fa: GAAGGTGACCAAGTTCATGCTAGATCTTTGGTAAAGATTTTCATCGGG  
A08\_  
1203372 Fb:  
3 GAAGGTCGGAGTCAACGGATTTAAGATCTTTGGTAAAGATTTTCATCGGT  
R: GGAATCATCAGCAGCTTCAGGATTAG  
Fa: GAAGGTGACCAAGTTCATGCTTTTGGGGGACGAGGCAATACTTT  
A08\_  
1082871 Fb: GAAGGTCGGAGTCAACGGATTTGGGGGACGAGGCAATACTTC  
4 R: ATTCCTTGACAGCGTTTGCAAGCA  
Fa: GAAGGTGACCAAGTTCATGCTTTTATCAATCTCTGTGATTTGAGATCC  
A08\_  
1065277 Fb: GAAGGTCGGAGTCAACGGATTTTATCAATCTCTGTGATTTGAGATCG  
5 R: CTAAACCCTAAAGTTTCCAACCTTTAGAAATATC  
Fa: GAAGGTGACCAAGTTCATGCTCTCGAGGATCTGAGATGAGATCT  
SNP-  
4586662 Fb: GAAGGTCGGAGTCAACGGATTTGAGGATCTGAGATGAGATCC  
R: GGGTGCACTAGCTGATATATTCCTAAG  
Fa: GAAGGTGACCAAGTTCATGCTTTTCTCCCGGTGAGAATATCTCC  
SNP-  
4678697 Fb: GAAGGTCGGAGTCAACGGATTAATTTTCTCCCGGTGAGAATATCTCT  
R: ATTTCAACGAAAACAAAACGTGTCAGAATG  
Fa: GAAGGTGACCAAGTTCATGCTCTTAGAATGAAGAGAGAGCCTAAGTA  
SNP-  
5170126 Fb: GAAGGTCGGAGTCAACGGATTTAGAATGAAGAGAGAGCCTAAGTC  
R: CAGCTTTATCAATCAAAAACCAAACCTTCATTG  
Fa:  
GAAGGTGACCAAGTTCATGCTTGTTCTTTTGTTTCATGAAAGTCAAACCA  
SNP-  
4940264 Fb:  
GAAGGTCGGAGTCAACGGATTTGTTCTTTTGTTTCATGAAAGTCAAACCT  
R: GGACTAGTCTGTTTGTTTCTACTCG  
Fa: GAAGGTGACCAAGTTCATGCTGATTCTTCCTTGGCAGTTTCCAC  
SNP-  
4868918 Fb: GAAGGTCGGAGTCAACGGATTGAGATTCTTCCTTGGCAGTTTCCAT  
R: GTCTTGGAGAATGATGTTTCCTTGTTG  
Fa: GAAGGTGACCAAGTTCATGCTTTCTGGAAGCCGTTGTTAGGT  
SNP-  
5044592 Fb: GAAGGTCGGAGTCAACGGATTTCTGGAAGCCGTTGTTAGGC  
R: GAATCACCTTCTCCCGGAAACAAAG  
Fa: GAAGGTGACCAAGTTCATGCTCAGTATCATTTCACTACAGGTTTGG  
SNP-  
5150528 Fb: GAAGGTCGGAGTCAACGGATTCCAGTATCATTTCACTACAGGTTTGT

|         |                                                     |
|---------|-----------------------------------------------------|
|         | R: CAAAGATTAACCTAATTATGCTAACAGAAAGAC                |
|         | Fa: GAAGGTGACCAAGTTCATGCTCATGACCAGATTTACTTGCACCATG  |
| SNP-    | Fb: GAAGGTCGGAGTCAACGGATTTCATGACCAGATTTACTTGCACCATA |
| 5219458 | R: ACTACAGAGGAAAAGCTTGCAAGGG                        |
|         | Fa: GAAGGTGACCAAGTTCATGCTCAATGAAGACATACTTGATGAGAGGA |
| SNP-    | Fb:                                                 |
| 5651136 | GAAGGTCGGAGTCAACGGATTCAATGAAGACATACTTGATGAGAGGT     |
|         | R: GCTCTTTCTCTGATCATTACTCTCTTTTG                    |
|         | Fa: GAAGGTGACCAAGTTCATGCTTTGCGGATTCAAGGTTTCCGCAT    |
| SNP-    | Fb: GAAGGTCGGAGTCAACGGATTGCGGATTCAAGGTTTCCGCAC      |
| 6100858 | R: GCGAGAGTACGTTGATAGGTATGTATG                      |
| ID-     | F: GAGCAGGAGTTCTTCAAGC                              |
| 5309452 | R: CTGGATTCTCATTGGTAAGAGT                           |
| ID-     | F: CAATGAGACCCAGTCGGA                               |
| 5455594 | R: TAGCTGCCAAAGAATATCACAG                           |
| ID-     | F: CTCTGTGATTGGGAACCG                               |
| 5814517 | R: GCTTTTGCAGGCTTGTATG                              |
| ID-     | F: GGAGGGTTCGTCATGTATATG                            |
| 5953322 | R: ATCGCTATGGGTACAAAACCTAC                          |
| ID-     | F: CGACCTTCTGGTGCATGT                               |
| 4398786 | R: CATGGACTCGCAACCTATG                              |

---
