# Supplementary material for: Identification of Clubroot (Plasmodiophora brassicae) Resistance Loci in Chinese Cabbage (Brassica rapa ssp. pekinensis) with Recessive Character
Source: MDPI journal article supplement (doi:10.3390/genes15030274), 2024-02-22
Supplement: s1 [file s1]

**Table S2.** Molecular markers linked identified CR genes

| Primer IDs  | Gene/Loci  | Sequence of primer                                                     |
|-------------|------------|------------------------------------------------------------------------|
| Craim-T     | <i>CRa</i> | F: TATATTAATGATAAAGCAGAAGAAGAAA<br>R: AATGCGACTGAGAAAGTTGTAG           |
| GC1680      |            | F: ATTCTACTTCCTTTTAGCTGCTCTAACCGC<br>R: TTCGTAATAATTGATTTGCATATCAATTGG |
| GC2360-1    |            | F: CAGCACCAGCATAACCAGCTACAGTC<br>R: AGAACTTTGCAAGTGGCTCAGATAAT         |
| SC2930-T    |            | F: TAGACCTTTTTTTTTGTCTTTTTTTTTTAC<br>R: CTAAGGCCATAGAAATCAGGTC         |
| SC2930-Q    |            | F: CAGACTAGACTTTTTGTCAATTTAGACT<br>R: AAGGCCATAGAAATCAGGTC             |
| HC352b-SCAR |            | F: CTTTATAATGGCTACTATTTA<br>R: TGCTCATGAGTGTATAACTA                    |
| TCR79       |            | F: TGACGTTCAATCAAAGCCTGA<br>R: TTTAGCAATCAAATGCAAATTCAA                |
| TCR108      |            | F: CGGATATTCGATCTGTGTTCA<br>R: AAAATGTATGTGTTTATGTGTTTCTGG             |
| K-3         |            | F: CTTTGGATTGTTGACCTT<br>R: ATGTTGATGCTACTGAGAC                        |
| TCR09       |            | F: GCAGCAACCGATAATATAAGGA<br>R: AACCAGAAGAAGAAAAACAAAAA                |
| TCR05       | <i>CRb</i> | F: AGAATCATGACCGGGGAAAT<br>R: GCAGCTAAGTCATCGACCAA                     |
| KBrH129J18R |            | F: AGAGCAGAGTGAAACCAGAACT<br>R: GTTTCAGTTCAGTCAGGTTTTTGCAG             |
| m6r         |            | F: CCTCTTGGAACCCATGAA<br>R: GCAATTATTGGCCTGTTCGT                       |
| B50-C9      | <i>CRc</i> | F: GATTCAATGCATTTCTCTCGAT<br>R: CGTATTATATCTCTTTCTCCATCCC              |
| B50-6R      |            | F: AATGCATTTTCGCTCAACC<br>R: CGTATTATATCTCTTTCTCCATCCC                 |
| HC688-4-6   | <i>CRk</i> | F: TCTCTGTATTGCGTTGACTG<br>R: ATATGTTGAAGCCTATGTCT                     |
| HC688-4-7   |            | F: TCTCTGTATTGCGTTGACTG                                                |

|          |             |                               |
|----------|-------------|-------------------------------|
|          |             | R: AAATATATGTGAAGTCTTATGATC   |
| yau376   |             | F: TGTCACCAGCGCATTATAGC       |
|          | <i>Crd</i>  | R: AAGGGAGGGAAGATGGGTTG       |
| yau389   |             | F: TCAAGTGGAGAGGGTCAGTC       |
|          |             | R: CAGTCACGAGGTCCCTAACA       |
| BRMS-088 | <i>Crr1</i> | F: TATCGGTACTGATTGCTCTTCAAC   |
|          |             | R: ATCGGTTGTTATTTGAGAGCAGATT  |
| BRMS-096 | <i>Crr2</i> | F: AGTCGAGATCTCGTTCGTGTCTCCC  |
|          |             | R: TGAAGAAGGATTGAAGCTGTTGTTG  |
| OPC11-2S |             | F: GTAACCTGGTACAGAACAGCATAG   |
|          |             | R: ACTTGTCTAATGAATGATGATGG    |
| OPC11-1S |             | F: TTACAGCTGGACCAAGAACATAG    |
|          | <i>Crr3</i> | R: ATCGATGTTTGTGAGTCTCTACT    |
| BrSTS-54 |             | F: CGTATAGACATAGAAGACATGGAAGC |
|          |             | R: GTGTTTATGCTGATTCCTTCACAG   |
| BrSTS-61 |             | F: CCATCCGCAGGAGTTAAAGTTGTA   |
|          |             | R: AGAAAACGGCTGAGGGTTACTAC    |
| sN8591   |             | R: TTGTGGGCAGGAACAATACA       |
|          | <i>Rcr1</i> | F: CTGGACGAGCCAAGCTAATC       |
| Sr6340I  |             | R: ATAGTTGGGAATGTGGCTGC       |
|          |             | F: CGGACACGAAATCAAACCTT       |

---
